# Supplementary material for: Adhesin competence repressor (AdcR) from Streptococcus pyogenes controls adaptive responses to zinc limitation and contributes to virulence
Source: PubMed Central journal article supplement — Nucleic Acids Res. 2014 Dec 15;43(1):418–32. doi: 10.1093/nar/gku1304 (PMC4288194; doi:10.1093/nar/gku1304), 2014-12-15
Supplement: supp_gku1304_nar-02203-m-2014-File010.pdf [file supp_gku1304_nar-02203-m-2014-File010.pdf]

Supplementary figure S1

A)

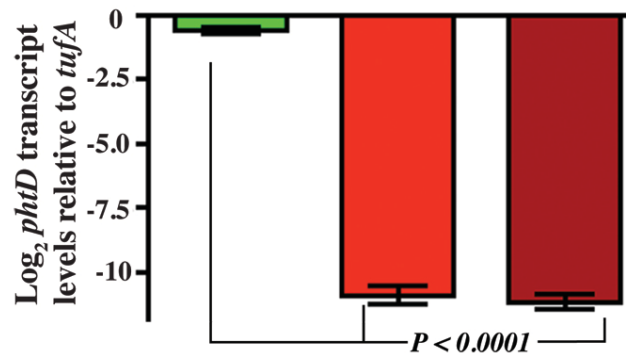

B)

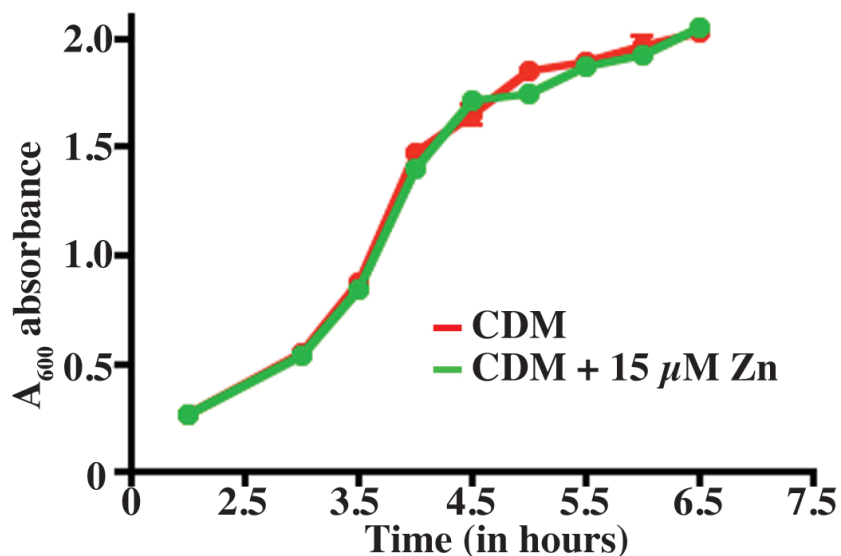

**Supplementary figure S1.** A) Transcript levels of *phtD* in strain MGAS10870 grown in chemically defined medium containing no (colored green), 10  $\mu\text{M}$  (colored red), and 15  $\mu\text{M}$  (colored dark red) zinc, as measured by qRT-PCR. Samples were collected at late-exponential ( $A_{600} \sim 1.0$ ) phase of growth for transcript level analysis. Triplicate biological replicates were grown and analyzed in 3 replicates. Data graphed are mean  $\pm$  standard deviation. B) Growth pattern of GAS grown in CDM or CDM supplemented with 15  $\mu\text{M}$  zinc.

Supplementary figure S2

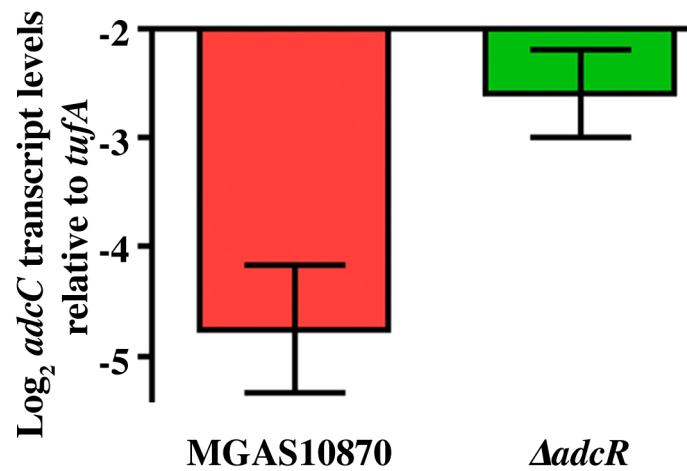

**Supplementary figure S2.** In-frame deletion of *adcR* gene in parental serotype MGAS10870 does not cause polar effect in the expression of downstream genes. Transcript levels of *adcC* in strain MGAS10870 and isogenic mutant  $\Delta$ *adcR* strain as measured by qRT-PCR. Samples were collected at late-exponential ( $A_{600} \sim 1.0$ ) phase of growth for transcript level analysis. Triplicate biological replicates were grown and analyzed in 3 replicates. Data graphed are mean  $\pm$  standard deviation.

Supplementary figure S3

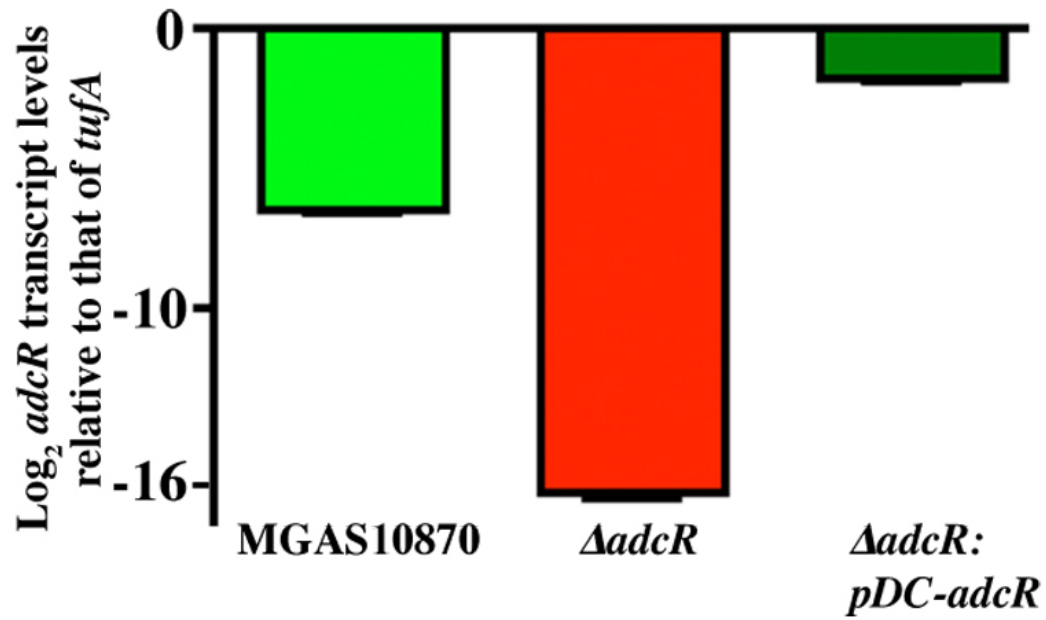

Supplementary figure S3. Transcript levels of *adcR* in indicated strains as measured by qRT-PCR.

Supplementary figure S4

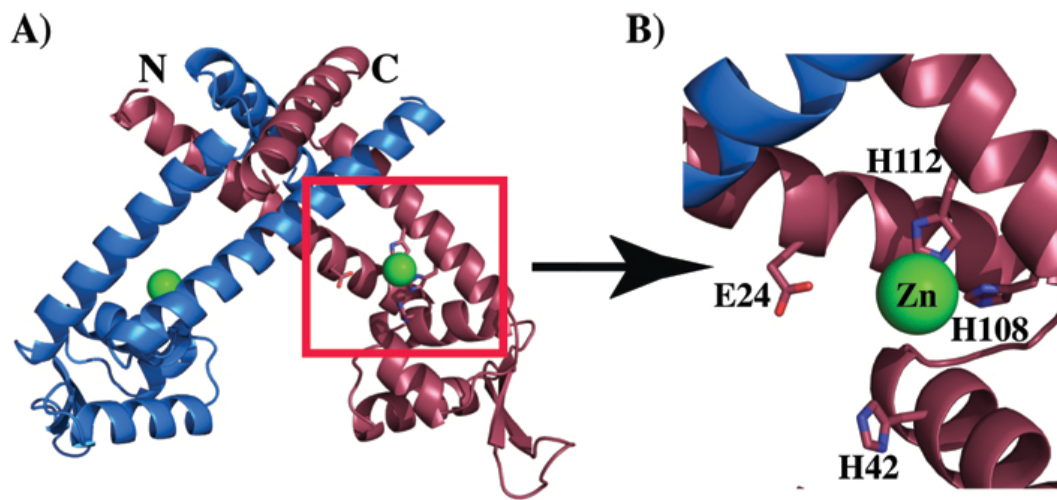

**Supplementary Figure S4.** A) Model of GAS AdcR dimer using the structure of AdcR from *S. pneumoniae* (PDB code – 3TGN). Individual subunits of AdcR are color coded in blue and pink. Zinc bound to the primary metal sensing site in the structure of pneumococcal AdcR is shown as a green sphere and the side chains of metal-coordinating amino acids are depicted in ball and stick representation. The N- and C-termini are labeled. B) A magnified view of the metal-binding site (boxed in red in panel A) with the metal binding ligands labeled.

**Supplementary Table S1.** Bacterial strains and plasmids used in this study.

| Strain or plasmid                               | Description                                                                                         | Reference     |
|-------------------------------------------------|-----------------------------------------------------------------------------------------------------|---------------|
| Strains                                         |                                                                                                     |               |
| MGAS10870                                       | Invasive isolate, serotype M3                                                                       | (26)          |
|                                                 |                                                                                                     | (Shelburne et |
| MGAS10870: <i>pDC</i>                           | MGAS10870 with empty vector, Cm <sup>+</sup>                                                        | al., 2011)    |
| $\Delta$ <i>adcR</i>                            | MGAS10870 $\Delta$ <i>adcR</i>                                                                      | This study    |
| $\Delta$ <i>adcR</i> : <i>pDC</i>               | MGAS10870 $\Delta$ <i>adcR</i> , empty vector, Cm <sup>+</sup>                                      | This study    |
| $\Delta$ <i>adcR</i> - <i>pDC</i> : <i>adcR</i> | MGAS10870 $\Delta$ <i>adcR</i> , <i>adcR</i> <sup>+</sup> , Cm <sup>+</sup>                         | This study    |
| Plasmids                                        |                                                                                                     |               |
| <i>pDC123</i>                                   | Low-copy number plasmid capable of replication in GAS and <i>Escherichia coli</i> , Cm <sup>+</sup> | (31)          |
| <i>pDC</i> : <i>adcR</i>                        | <i>pDC123</i> with entire <i>adcR</i> gene plus promoter, Cm <sup>+</sup>                           | This study    |
|                                                 | Temperature-sensitive <i>E. coli</i> -Gram positive                                                 |               |
| <i>pJL1055</i>                                  | shuttle vector used for allelic replacement                                                         | (27,28)       |

**Supplementary Table S2. Primers and probes used in this study**

| <b>Primer</b>      | <b>Sequence (5'-3')</b>                      | <b>Target</b>                                                                             |
|--------------------|----------------------------------------------|-------------------------------------------------------------------------------------------|
| <b>adcR-KO 5'</b>  | GAGATTTATGGGGACTTTAGAAGAATTAGAAGGG<br>TAATCC | 5' primer for 5'<br>region of <i>adcR</i>                                                 |
| <b>adcR-KO 3'</b>  | GGATTACCCTTCTAATTCTTCTAAAGTCCCCATAA<br>ATCTC | 3' primer for 5'<br>region of <i>adcR</i>                                                 |
| <b>adcR-For</b>    | TGCTTTGAGATGGGATCCCAATATAAAG                 | 5' primer for 5'<br>region of <i>adcR</i> to<br>generate upstream<br>flanking region      |
| <b>adcR-Rev</b>    | AACTTGTTCCACTCGAGTCGTGATGATC                 | 3' primer for 3'<br>region of <i>adcR</i> to<br>generate<br>downstream<br>flanking region |
| <b>pDCadcR-F</b>   | GGAAGATCTCTATTGTGATGAATCGCTGTC               | 5' <i>adcR</i> primer for<br>complementation                                              |
| <b>pDCadcR-R</b>   | GGAATCCATATGCTAAAAATCAGGTTGGTC               | 3' <i>adcR</i> primer for<br>full length <i>adcR</i><br>complementation                   |
| <b>adcR qRT 5'</b> | ATATTAGTCAGGCGGCAGTAAC                       | 5' primer for <i>adcR</i><br>qRT-PCR                                                      |
| <b>adcR qRT 3'</b> | CACCCTAGCATCAACCGTATC                        | 3' primer for <i>adcR</i><br>qRT-PCR                                                      |
| <b>adcR probe</b>  | TGGTCAAACAAGACATGCTAGCAGGA                   | Probe for <i>adcR</i><br>qRT-PCR                                                          |
| <b>tufA qRT 5'</b> | CAACTCGTCACTATGCGCACAT                       | 5' primer for <i>tufA</i><br>qRT-PCR                                                      |
| <b>tufA qRT 3'</b> | GAGCGGCACCAGTGATCAT                          | 3' primer for <i>tufA</i><br>qRT-PCR                                                      |
| <b>tufA probe</b>  | CTCCAGGACACGCGGACTACGTAAAAA                  | Probe for <i>tufA</i><br>qRT-PCR                                                          |
| <b>phtD probe</b>  | CCAATTCCTGATGTGACGCCTAACCCCT                 | Probe for <i>phtD</i><br>qRT-PCR                                                          |
| <b>phtD qRT 5'</b> | GCCCCAGGTCGTAGGAAAG                          | 5' primer for <i>phtD</i><br>qRT-PCR                                                      |
| <b>phtD qRT 3'</b> | CCGTTATCTGGCTGATGACCTT                       | 3' primer for <i>phtD</i><br>qRT-PCR                                                      |
| <b>adcC probe</b>  | TGCCCGTATGTTTGCTTCTGACCCTGATAT               | Probe for <i>adcC</i><br>qRT-PCR                                                          |
| <b>adcC qRT 5'</b> | TGGTCAAAAACAACGTGTGGTTA                      | 5' primer for <i>adcC</i><br>qRT-PCR                                                      |
| <b>adcC qRT 3'</b> | TTGTTGGCTCGTCTAGCACAA                        | 3' primer for <i>adcC</i><br>qRT-PCR                                                      |
| <b>hasA probe</b>  | CGCCATGCTCAAGCGTGGGC                         | Probe for <i>hasA</i><br>qRT-PCR                                                          |

|                      |                                  |                                                                      |
|----------------------|----------------------------------|----------------------------------------------------------------------|
| <b>hasA qRT 5'</b>   | ACCGTTCCTTGTCAATAAAGG            | 5' primer for <i>hasA</i> qRT-PCR                                    |
| <b>hasA qRT 3'</b>   | CGTCAGCGTCAGATCTTTCAA            | 3' primer for <i>hasA</i> qRT-PCR                                    |
| <b>pET21bdc R-5'</b> | GGGAATTCCATATGGACATTCATTCACATCAG | 5' <i>perR</i> primer for the construction of overexpression plasmid |
| <b>pET21bdc R-3'</b> | CCGCTCGAGAAAATCAGGTTGGTCTTTTGCT  | 3' <i>perR</i> primer for the construction of overexpression plasmid |

**Supplementary Table S3.** Genes that are differentially regulated in GAS during zinc starvation

| <b>Locus tag</b>                    | <b>Spy Number<sup>a</sup></b> | <b>Fold-change<sup>b</sup></b> | <b>Annotation<sup>c</sup></b>                         |
|-------------------------------------|-------------------------------|--------------------------------|-------------------------------------------------------|
| <b><u>Genes</u></b>                 |                               |                                |                                                       |
| <b><u>Downregulated</u></b>         |                               |                                |                                                       |
| <b><u>Zinc homeostasis</u></b>      |                               |                                |                                                       |
| <i>adcA</i>                         | SpyM3_0466                    | 61.5                           | Extracellular zinc-binding subunit                    |
| <i>adcB</i>                         | SpyM3_0071                    | 3.8                            | ABC transporter - permease                            |
| <i>adcC</i>                         | SpyM3_0070                    | 3.3                            | ABC transporter – ATP-binding protein                 |
| <i>adcAII</i>                       | SpyM3_1725                    | 364.0                          | Extracellular zinc-binding subunit                    |
| <i>phtD</i>                         | SpyM3_1724                    | 341.2                          | Polyhistidine triad protein D                         |
| <i>phtY</i>                         | SpyM3_1035                    | 198.5                          | Polyhistidine triad protein Y                         |
| <i>rpsN</i>                         | SpyM3_1615                    | 156.1                          | 30S ribosomal protein subunit S14                     |
| <b><u>Transporters</u></b>          |                               |                                |                                                       |
| <i>dppA</i>                         | SpyM3_1718                    | 7.3                            | Dipeptide surface lipoprotein                         |
| <i>dppB</i>                         | SpyM3_1719                    | 7.3                            | Dipeptide ABC transporter permease                    |
| <i>dppC</i>                         | SpyM3_1720                    | 6.0                            | Dipeptide ABC transporter permease                    |
| <i>dppD</i>                         | SpyM3_1721                    | 6.2                            | Dipeptide ABC transporter ATP-binding subunit         |
| <i>dppE</i>                         | SpyM3_1722                    | 6.5                            | Dipeptide ABC transporter ATP-binding subunit         |
| <i>mtsA</i>                         | SpyM3_0381                    | 3.4                            | ABC transporter - Extracellular metal-binding subunit |
| <i>mtsB</i>                         | SpyM3_0391                    | 4.1                            | ABC transporter - ATP-binding protein                 |
| <i>mtsC</i>                         | SpyM3_0320                    | 3.5                            | ABC transporter – permease                            |
| <b><u>Genes upregulated</u></b>     |                               |                                |                                                       |
| <b><u>Hypothetical proteins</u></b> |                               |                                |                                                       |
| <i>M3_0025</i>                      | SpyM3_0025                    | 2.0                            | Choline binding protein                               |
| <i>M3_1666</i>                      | SpyM3_1666                    | 2.2                            | Hypothetical protein                                  |



**Supplementary Table S4.** Genes that are upregulated in  $\Delta$ *adcR*.

| <b>Locus tag</b>                | <b>Spy Number<sup>a</sup></b> | <b>Fold-change<sup>b</sup></b> | <b>Annotation<sup>c</sup></b>                 |
|---------------------------------|-------------------------------|--------------------------------|-----------------------------------------------|
| <b><u>Zinc homeostasis</u></b>  |                               |                                |                                               |
| <i>adcA</i>                     | SpyM3_0466                    | 15.6                           | Extracellular zinc-binding subunit            |
| <i>adcB</i>                     | SpyM3_0071                    | 4.3                            | ABC transporter - permease                    |
| <i>adcC</i>                     | SpyM3_0070                    | 4.5                            | ABC transporter – ATP-binding protein         |
| <i>adcAII</i>                   | SpyM3_1725                    | 119.1                          | Extracellular zinc-binding subunit            |
| <i>phtD</i>                     | SpyM3_1724                    | 92.7                           | Polyhistidine triad protein D                 |
| <i>phtY</i>                     | SpyM3_1035                    | 67.3                           | Polyhistidine triad protein Y                 |
| <i>rpsN</i>                     | SpyM3_1615                    | 74.9                           | 30S ribosomal protein subunit S14             |
| <i>adh1</i>                     | SpyM3_0037                    | 2.2                            | alcohol dehydrogenase                         |
| <i>adh2</i>                     | SpyM3_0036                    | 3.5                            | alcohol dehydrogenase                         |
| <b><u>Transporters</u></b>      |                               |                                |                                               |
| <i>dppA</i>                     | SpyM3_1718                    | 3.4                            | Dipeptide surface lipoprotein                 |
| <i>dppB</i>                     | SpyM3_1719                    | 2.2                            | Dipeptide ABC transporter permease            |
| <i>dppC</i>                     | SpyM3_1720                    | 2.1                            | Dipeptide ABC transporter permease            |
| <i>dppD</i>                     | SpyM3_1721                    | 2.1                            | Dipeptide ABC transporter ATP-binding subunit |
| <i>dppE</i>                     | SpyM3_1722                    | 2.2                            | Dipeptide ABC transporter ATP-binding subunit |
| <i>M3_0790</i>                  | SpyM3_0790                    | 2.3                            | Na <sup>+</sup> driven multidrug efflux pump  |
| <b><u>Virulence factors</u></b> |                               |                                |                                               |
| <i>sagB</i>                     | SpyM3_0481                    | 2.1                            | Streptolysin-S biosynthesis protein           |
| <i>MF</i>                       | SpyM3_1745                    | 3.9                            | Mitogenic factor 25K precursor                |
| <i>sdn</i>                      | SpyM3_1409                    | 3.9                            | Streptodornase – phage associated             |
| <i>prsA</i>                     | SpyM3_1740                    | 2.2                            | Foldase/prolyl-peptidyl isomerase             |
| <b><u>Enzymes</u></b>           |                               |                                |                                               |
| <i>arcA</i>                     | SpyM3_1196                    | 3.9                            | Arginine deaminase                            |
| <i>arcB</i>                     | SpyM3_1194                    | 4.4                            | Ornithine carbamoyltransferase                |
| <i>arcC</i>                     | SpyM3_1191                    | 4.2                            | Carbamate kinase                              |
| <i>nagB</i>                     | SpyM3_1065                    | 2.6                            | N-acetylglucosamine-6-phosphate isomerase     |
| <i>M3_0788</i>                  | SpyM3_0788                    | 4.1                            | Short chain                                   |

|                                     |            |     |                                                 |
|-------------------------------------|------------|-----|-------------------------------------------------|
| <i>M3_0788</i>                      | SpyM3_0788 | 4.1 | Short chain<br><br>dehydrogenase/oxidoreductase |
| <i>M3_0789</i>                      | SpyM3_0789 | 3.1 | Short chain<br>dehydrogenase/oxidoreductase     |
| <b><u>Hypothetical proteins</u></b> |            |     |                                                 |
| <i>M3_1195</i>                      | SpyM3_1195 | 4.2 | Hypothetical protein                            |
| <i>M3_1192</i>                      | SpyM3_1192 | 3.8 | Hypothetical protein                            |
| <i>M3_1723</i>                      | SpyM3_1723 | 2.1 | Hypothetical protein                            |
| <b><u>Others</u></b>                |            |     |                                                 |
| <i>M3_0404</i>                      | SpyM3_0404 | 4.2 | PTS system transporter subunit<br>IIABC         |
| thrs                                | SpyM3_0365 | 2.4 | Threonyl-tRNA synthetase                        |

**Supplementary Table S5.** Genes that are downregulated in *ΔadcR*

| <b>Locus tag</b>           | <b>Spy Number<sup>a</sup></b> | <b>Fold-change<sup>b</sup></b> | <b>Annotation<sup>c</sup></b>                   |
|----------------------------|-------------------------------|--------------------------------|-------------------------------------------------|
| <b><u>Zinc</u></b>         |                               |                                |                                                 |
| <b><u>homeostasis</u></b>  |                               |                                |                                                 |
| <i>adcR</i>                | SpyM3_0069                    | 717.5                          | Adhesin-competence repressor                    |
| <b><u>Transporters</u></b> |                               |                                |                                                 |
| <i>cadX</i>                | SpyM3_1819                    | 2.8                            | Cadmium efflux pump accessory protein           |
| <i>cadD</i>                | SpyM3_1818                    | 2.2                            | Cadmium resistance protein                      |
| <i>fhuC.2</i>              | SpyM3_1558                    | 2.5                            | Ferrichrome ABC transporter–ATP-binding protein |
| <i>fhuG.2</i>              | SpyM3_1559                    | 2.6                            | Ferrichrome ABC transporter– permease           |
| <i>M3_0655</i>             | SpyM3_0655                    | 2.3                            | ABC transporter–permease                        |
| <i>M3_0656</i>             | SpyM3_0656                    | 2.2                            | ABC transporter–ATP-binding protein             |
| <b><u>Virulence</u></b>    |                               |                                |                                                 |
| <b><u>Factors</u></b>      |                               |                                |                                                 |
| <i>speA3</i>               | SpyM3_1301                    | 3.3                            | Exotoxin A precursor – phage associated         |
| <i>scpA</i>                | SpyM3_1726                    | 3.3                            | C5A peptidase precursor                         |
| <i>hasA</i>                | SpyM3_1851                    | 14.9                           | Hyaluronate synthase                            |
| <i>hasB</i>                | SpyM3_1852                    | 15.5                           | UDP-glucose-6-dehydrogenase                     |
| <i>hasC</i>                | SpyM3_1853                    | 14.0                           | UDP-glucose-pyrophosphorylase                   |
| <i>prtS</i>                | SpyM3_0298                    | 28.2                           | Cell envelope proteinase                        |
|                            | SpyM3_1698                    | 4.8                            | Streptokinase A precursor                       |
| <i>ska</i>                 |                               |                                |                                                 |
| <b><u>Enzymes</u></b>      |                               |                                |                                                 |
| <i>Nga</i>                 | SpyM3_0128                    | 2.1                            | NAD glycohydrolase                              |
| <i>adk</i>                 | SpyM3_0061                    | 2.4                            | Adenylate kinase                                |
| <i>purF</i>                | SpyM3_0021                    | 3.1                            | Amidophosphoribosyltransferase                  |
| <b><u>Ribosomal</u></b>    |                               |                                |                                                 |
| <b><u>proteins</u></b>     |                               |                                |                                                 |
| <i>rplN</i>                | SpyM3_0050                    | 2.2                            | 50S ribosomal protein subunit L14               |
| <i>rplX</i>                | SpyM3_0051                    | 2.1                            | 50S ribosomal protein subunit L24               |
| <i>rplF</i>                | SpyM3_0055                    | 2.0                            | 50S ribosomal protein subunit L6                |
| <i>rpmC</i>                | SpyM3_0048                    | 2.0                            | 50S ribosomal protein subunit L29               |
| <b><u>Hypothetical</u></b> |                               |                                |                                                 |
| <b><u>proteins</u></b>     |                               |                                |                                                 |
| <i>M3_0105</i>             | SpyM3_0105                    | 3.1                            | Hypothetical protein                            |
| <i>M3_0129</i>             | SpyM3_0129                    | 2.0                            | Hypothetical protein                            |
| <i>M3_0305</i>             | SpyM3_0305                    | 3.4                            | Hypothetical protein                            |
| <i>M3_0307</i>             | SpyM3_0307                    | 2.5                            | Hypothetical protein                            |
| <i>M3_0583</i>             | SpyM3_0583                    | 6.6                            | Hypothetical protein                            |
| <i>M3_1414</i>             | SpyM3_1414                    | 3.2                            | Hypothetical protein                            |
| <i>M3_1415</i>             | SpyM3-1415                    | 2.5                            | Hypothetical protein                            |
| <i>M3_1417</i>             | SpyM3_1417                    | 2.4                            | Hypothetical protein                            |
| <i>M3_1424</i>             | SpyM3_1424                    | 3.1                            | Hypothetical protein                            |

|                |            |     |                                          |
|----------------|------------|-----|------------------------------------------|
| <i>M3_1424</i> | SpyM3_1424 | 3.1 | Hypothetical protein                     |
| <i>M3_1425</i> | SpyM3_1425 | 3.2 | Hypothetical protein                     |
| <i>M3_1428</i> | SpyM3_1428 | 2.1 | Hypothetical protein                     |
| <i>M3_1429</i> | SpyM3_1429 | 2.6 | Hypothetical protein                     |
| <i>M3_1430</i> | SpyM3_1430 | 2.9 | Hypothetical protein                     |
| <i>M3_1434</i> | SpyM3_1434 | 2.1 | Hypothetical protein                     |
| <i>M3_1683</i> | SpyM3_1683 | 4.6 | Hypothetical protein                     |
| <i>M3_1820</i> | SpyM3_1820 | 2.5 | Hypothetical protein                     |
| <i>M3_1821</i> | SpyM3_1821 | 2.7 | Hypothetical protein                     |
| <i>M3_1822</i> | SpyM3_1822 | 2.6 | Hypothetical protein                     |
| <b>Other</b>   |            |     |                                          |
| <i>murM.2</i>  | SpyM3_0846 | 2.5 | Anti resistance factor                   |
| <i>M3_0157</i> | SpyM3_0157 | 2.1 | Regulatory protein RofA related          |
| <i>M3_1208</i> | SpyM3_1208 | 2.4 | Cell wall hydrolase-phage associated     |
| <i>M3_1421</i> | SpyM3_1421 | 2.3 | Tail protein-phage associated            |
| <i>M3_1436</i> | SpyM3_1436 | 2.7 | Terminase small subunit-phage associated |
